# Supplementary material for: Rapid and sensitive detection ofStaphylococcus aureusandKlebsiella pneumoniabased on bacitracin-modified Fe3O4@PDA magnetic beads combined with matrix-assisted laser desorption ionization-time of flight mass spectrometry
Source: Royal Society of Chemistry journal article supplement (doi:10.1039/d1ay00614b), 2021-01-01
Supplement: d1ay00614b1.pdf [file d1ay00614b1.pdf]

## Supporting information

### **Rapid and Sensitive detection of *Staphylococcus aureus* and *Klebsiella pneumonia* based on Bacitracin-modified Fe<sub>3</sub>O<sub>4</sub>@PDA magnetic beads combined with Matrix-Assisted Laser Desorption Ionization-Time of Flight Mass Spectrometry**

Feng Qin<sup>a,b</sup>, Shujuan Wang<sup>b</sup>, Mingxia Gao<sup>\*a</sup>, Xiangmin Zhang<sup>\*a</sup>

a Department of Chemistry, Fudan University, Shanghai 200433, China

b NMPA Key Laboratory for Testing Technology of Pharmaceutical Microbiology, Shanghai  
Institute for Food and Drug Control, Shanghai 201203, China

\*Corresponding author: Prof. Xiangmin Zhang, Mingxia Gao

E-mail: xmzhang@fudan.edu.cn, mxgao@fudan.edu.cn

Fax: +86-021-50798180

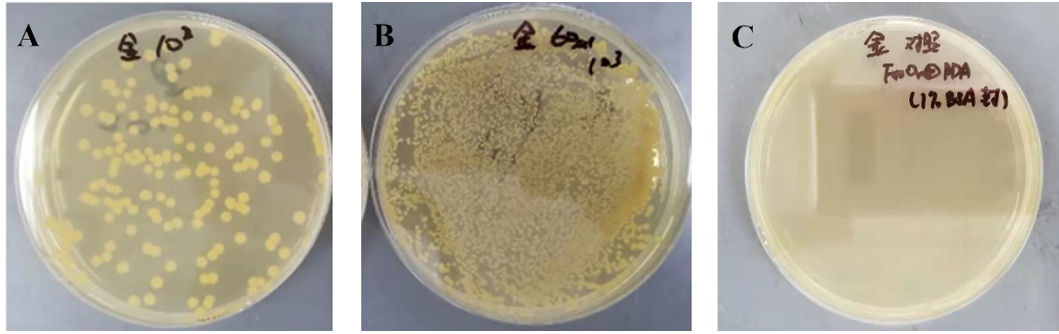

**Fig.S1** The effect of adding  $\text{Fe}_3\text{O}_4@\text{PDA}@\text{Bacitracin}$  and  $\text{Fe}_3\text{O}_4@\text{PDA}$  (negative control) on the enrichment *S. aureus*

The plate results of *S.aureus* (A) before enrichment, (B) enrichment by 60 $\mu\text{L}$   $\text{Fe}_3\text{O}_4@\text{PDA}@\text{Bacitracin}$ , (C) enrichment by 60 $\mu\text{L}$   $\text{Fe}_3\text{O}_4@\text{PDA}$ (negative control)

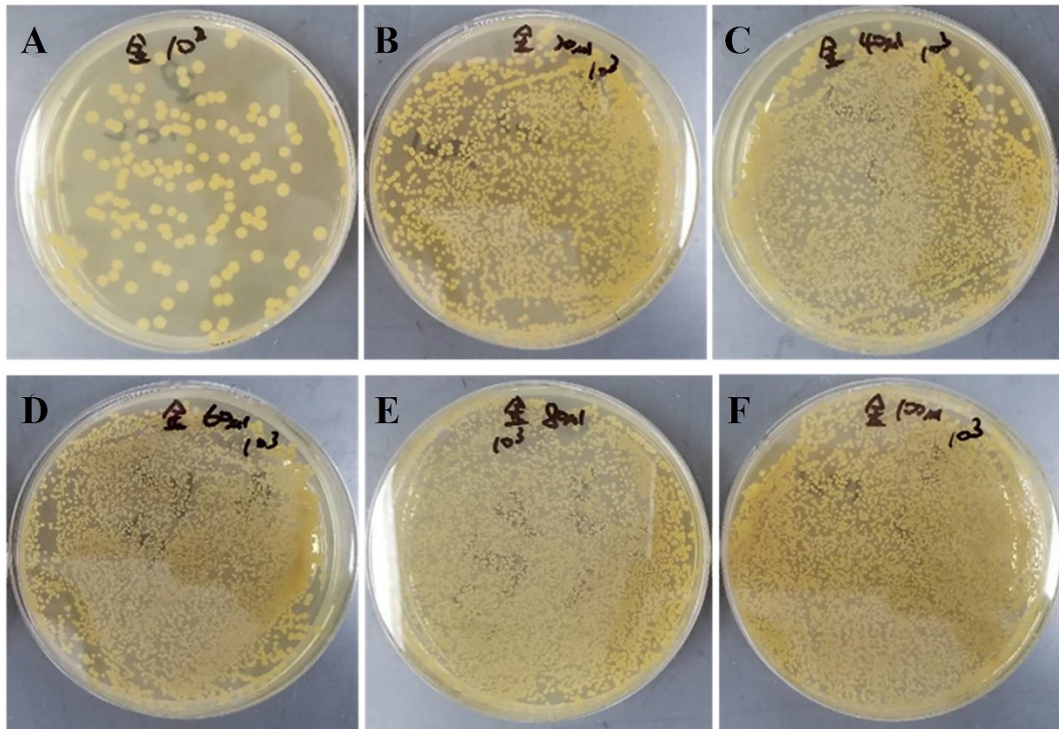

**Fig.S2** Effect of the different volume of  $\text{Fe}_3\text{O}_4@\text{PDA}@\text{Bacitracin}$  on the enrichment of *Staphylococcus aureus*.

(A)The plate results of the count of  $10^2 \text{CFU}\cdot\text{mL}^{-1}$  *S. aureus* (before enrichment); (B)-(F). The plate results of the count of  $10^3 \text{CFU}\cdot\text{mL}^{-1}$  *S.aureus* after enriched by 20,40,60,80,100  $\mu\text{L}$   $\text{Fe}_3\text{O}_4@\text{PDA}@\text{Bacitracin}$  in turn

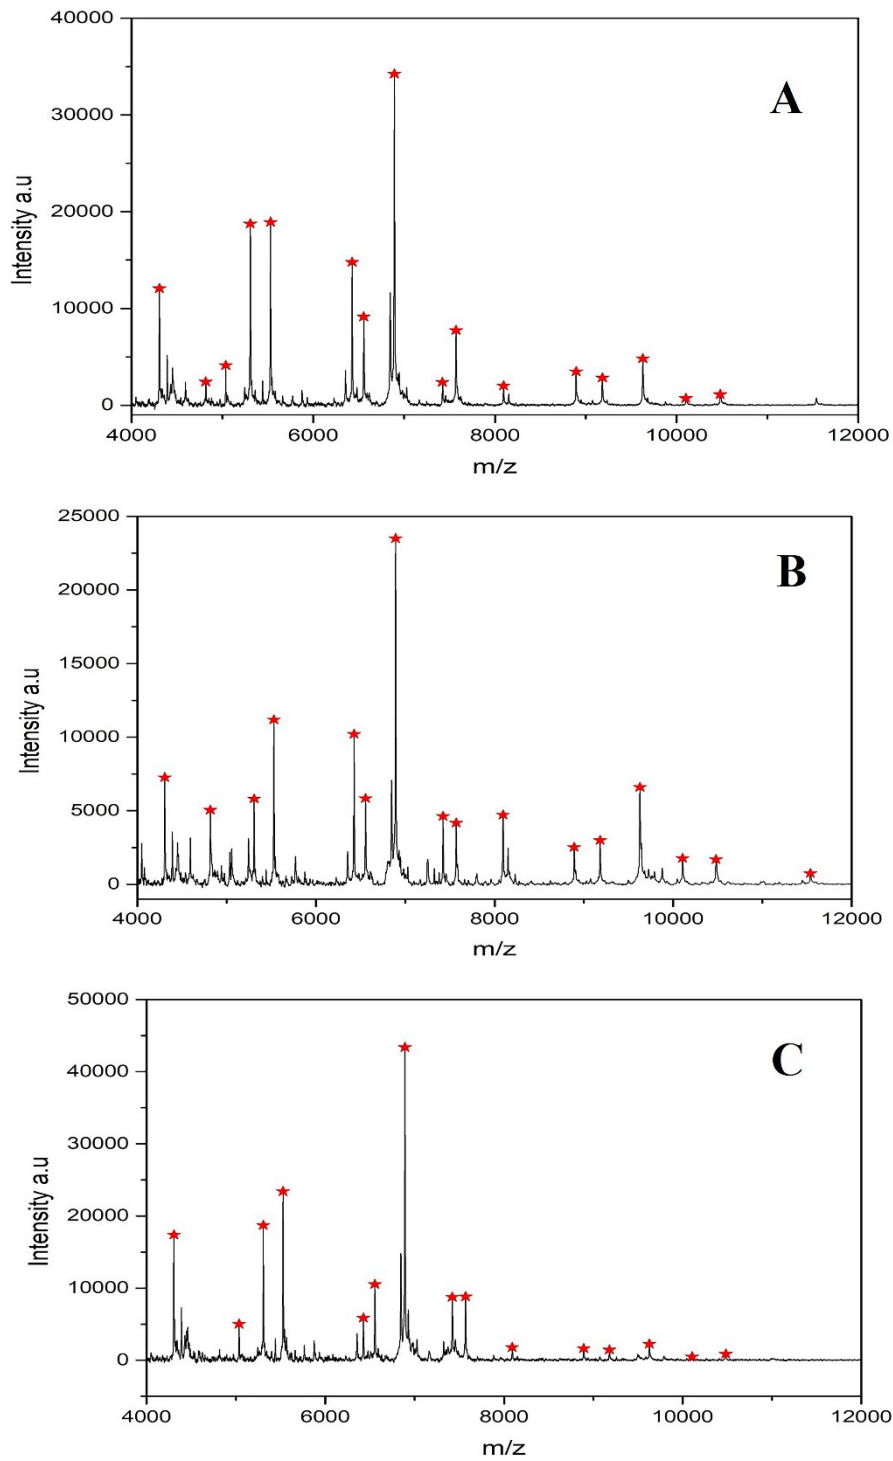

**Fig. S3** Effect of different bacterial protein extraction pre-treatment methods on MALDI-TOF MS assay. (A) 70% formic acid treatment before targeting, (B) 70% formic acid / acetonitrile (1:1) treatment before targeting, (C) target first and then treated with 70% formic acid

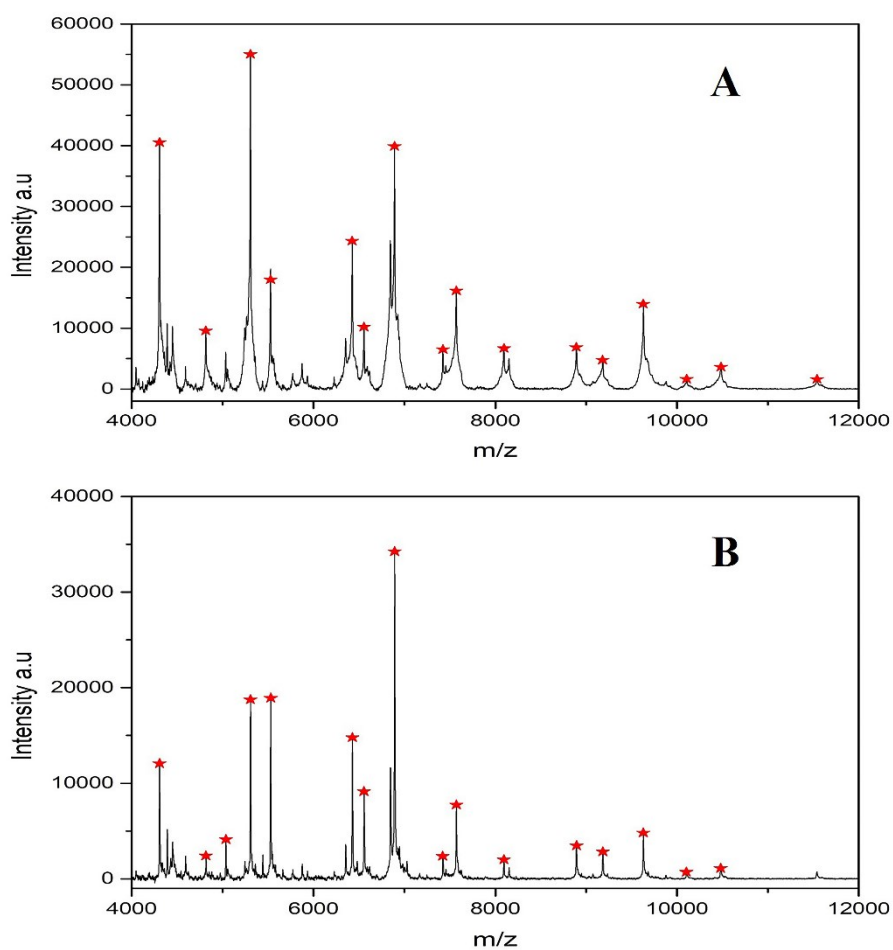

**Fig.S4** Effects of different matrixes on the MALDI-TOF MS analysis  
(A)  $\alpha$ -CHCA (B) DHB

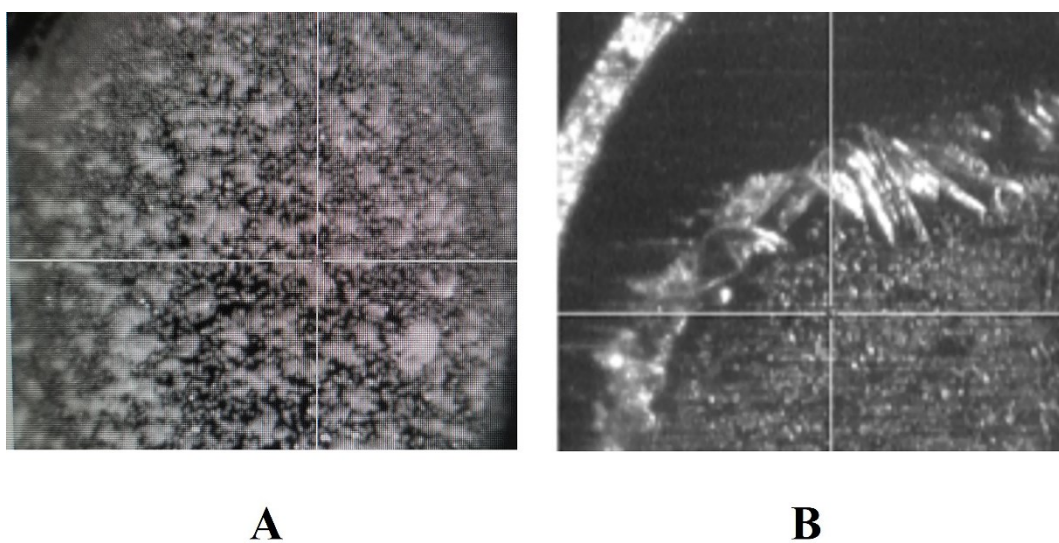

**Fig.S5** Imaging of *S. aureus* protein treated by different matrixes in visual field  
(A)  $\alpha$ -CHCA (B) DHB

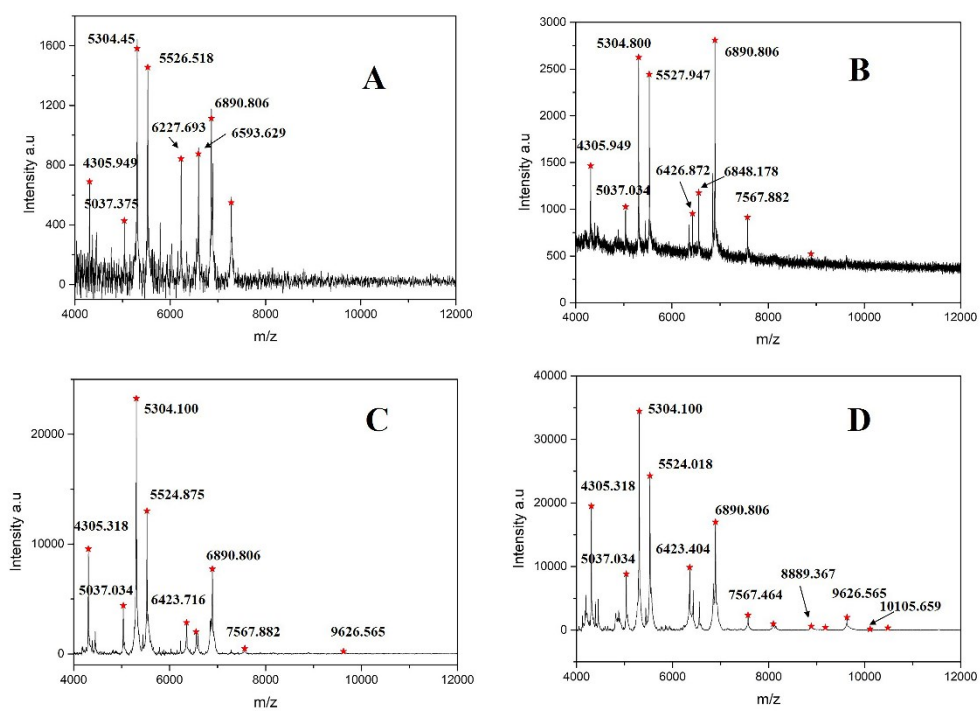

**Fig.S6** MALDI-TOF-MS spectra of different concentrations of the *S. aureus* in aqueous solution after enrichment by Fe<sub>3</sub>O<sub>4</sub>@PDA@Bacitracin: (A) 10<sup>4</sup>CFU·mL<sup>-1</sup> (B) 10<sup>5</sup>CFU·mL<sup>-1</sup> (C) 10<sup>6</sup>CFU·mL<sup>-1</sup> (D) 10<sup>7</sup>CFU·mL<sup>-1</sup>

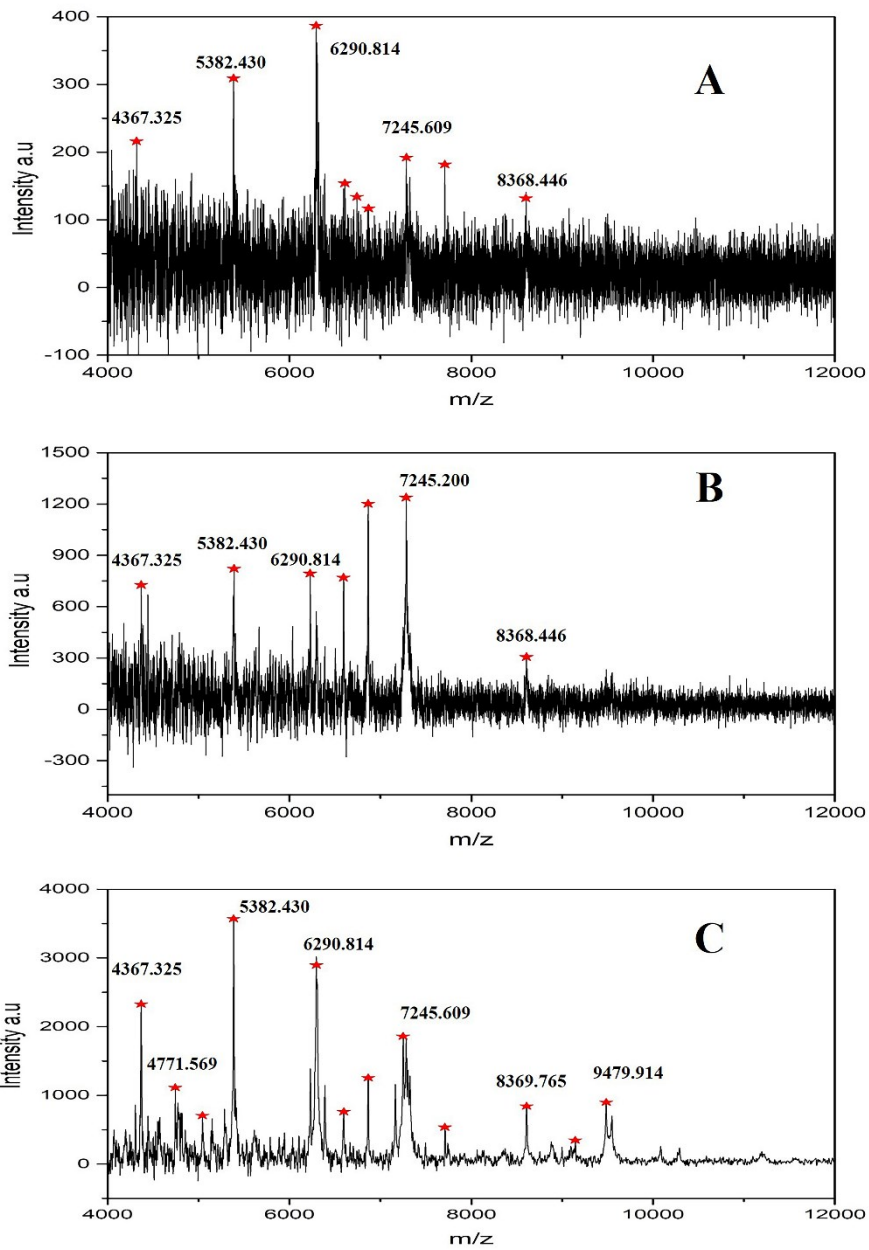

**Fig.S7** MALDI-TOF-MS spectra of different concentrations of the *K. pneumoniae* in aqueous solution after enrichment by Fe<sub>3</sub>O<sub>4</sub>@PDA@Bacitracin: (A) 10<sup>5</sup>CFU·mL<sup>-1</sup> (B) 10<sup>6</sup>CFU·mL<sup>-1</sup> (C) 10<sup>7</sup>CFU·mL<sup>-1</sup>

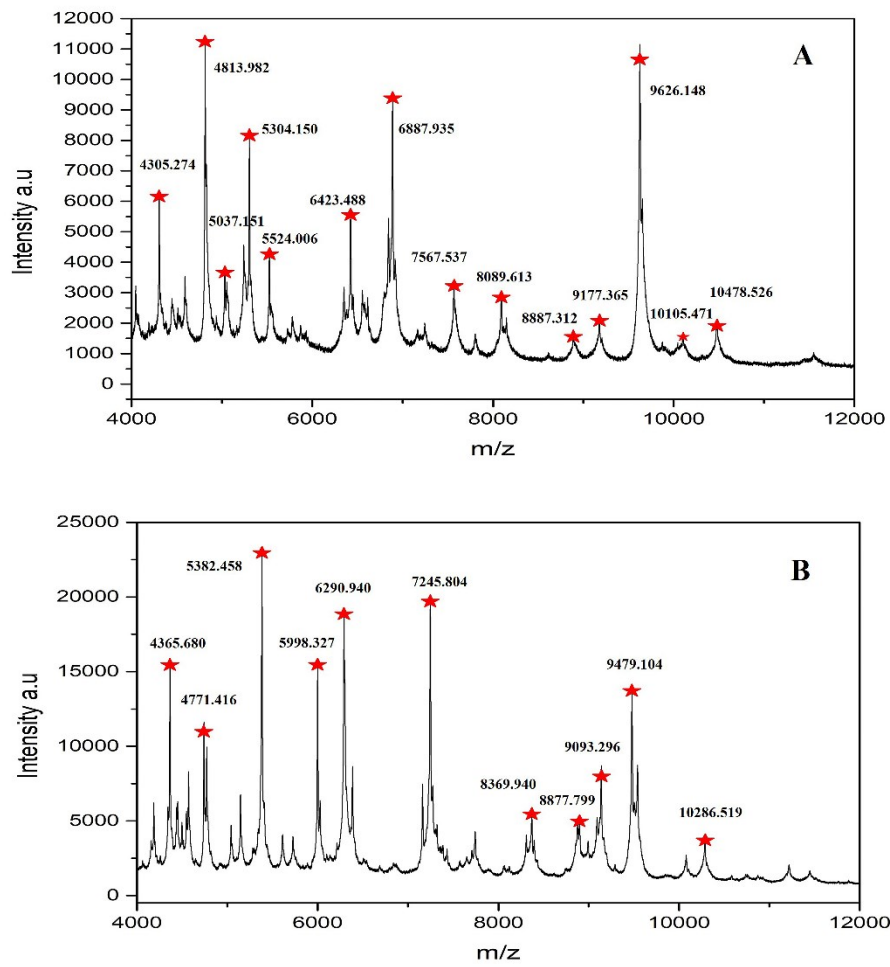

**Fig.S8** Reference MS spectra of (A) *Staphylococcus aureus* and (B) *Klebsiella pneumonia*

**Table S1 Enrichment of Fe<sub>3</sub>O<sub>4</sub>@PDA@Bacitracin to different bacteria**

| Name of bacteria                    | Plate counting results<br>(CFU·mL <sup>-1</sup> ) | Enrichment ratio |
|-------------------------------------|---------------------------------------------------|------------------|
| <i>S.aureus</i>                     | 1.45×10 <sup>3</sup>                              | 45.2%            |
| <i>K.pneumoniae</i>                 | 4.3×10 <sup>3</sup>                               | 37.0%            |
| <i>P.aeruginosa</i>                 | 2.57×10 <sup>3</sup>                              | 20.9%            |
| <i>Listeria monocytogenes</i>       | 1.47×10 <sup>3</sup>                              | 8.61%            |
| <i>Pyogeniccoccus</i>               | 2×10 <sup>3</sup>                                 | 6.62%            |
| <i>E. Coli</i>                      | 1.26×10 <sup>3</sup>                              | 6.42%            |
| <i>shigella flexneri</i>            | 2.75×10 <sup>3</sup>                              | 1.92%            |
| <i>beta hemolytic streptococcus</i> | 1.42×10 <sup>3</sup>                              | 1.21%            |
| <i>E. coli</i> O157:H7              | 8.85×10 <sup>3</sup>                              | 0%               |
| <i>Enterobacter sakazakii</i>       | 4.95×10 <sup>3</sup>                              | 0%               |
